# Supplementary material
Source: PubMed Central journal article supplement (PMC4004669)

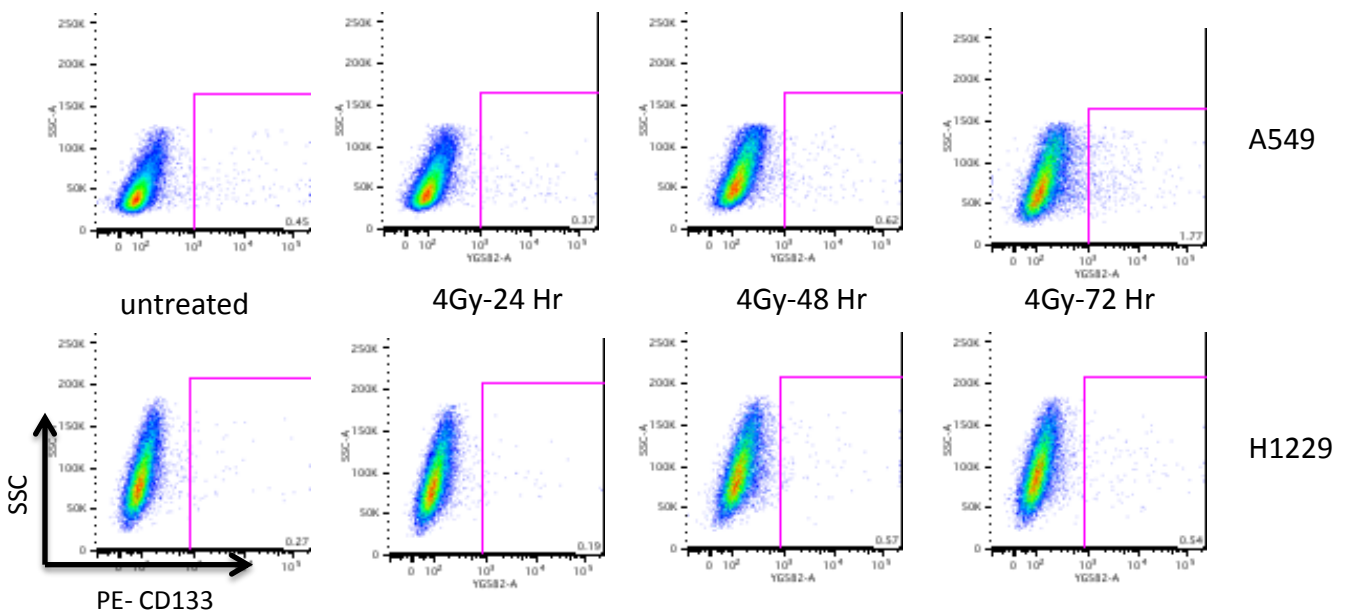

CD133 Levels in A549 cells post 4Gy

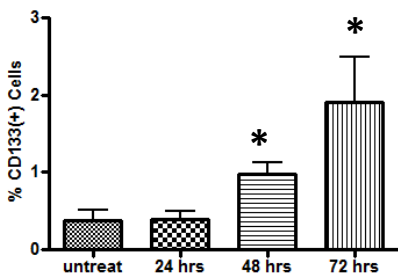

CD133 Levels in H1229 post 4Gy IR

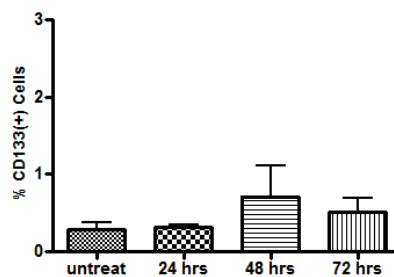

**A549**

CD133 (-) cells

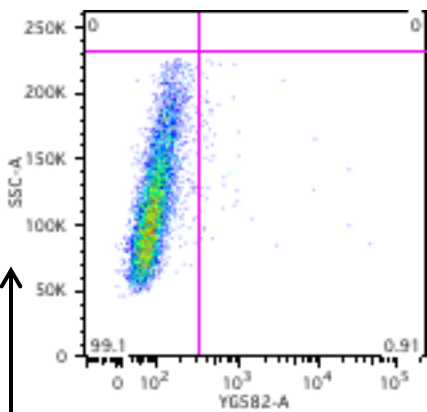

CD133 (+) cells

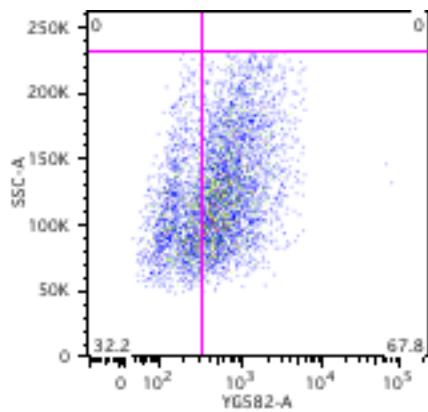

**H1299**

SSC

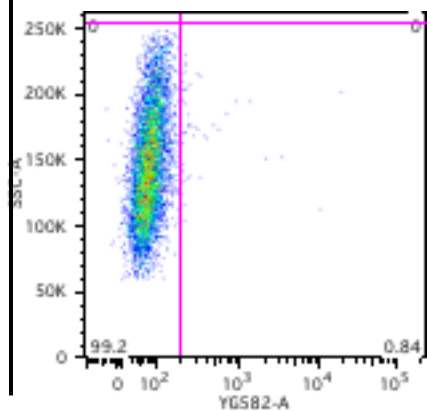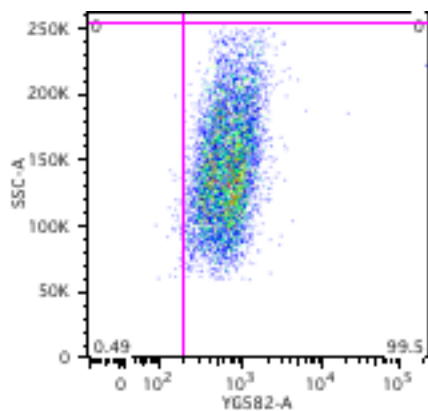

CD133

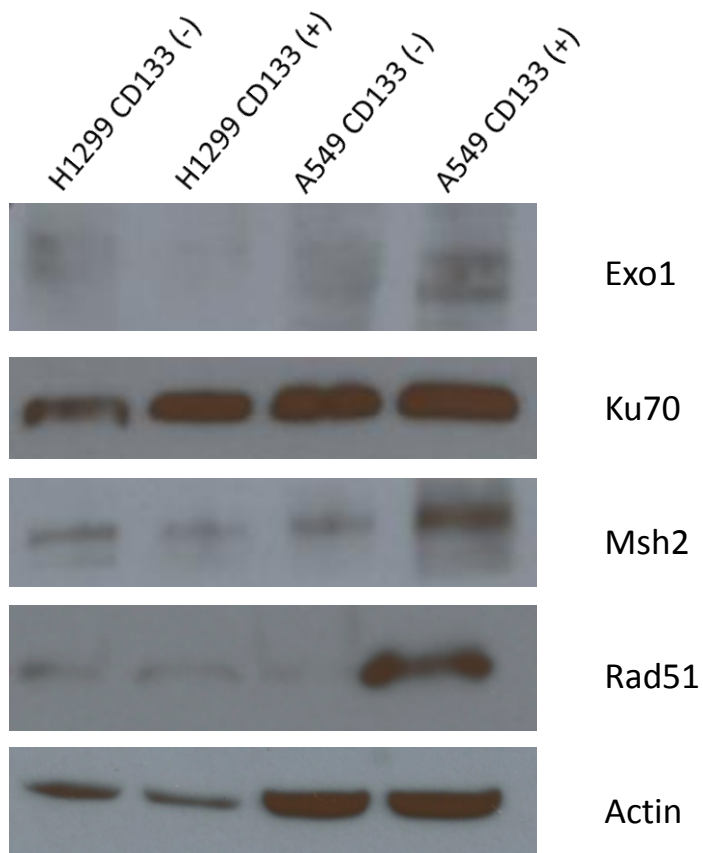

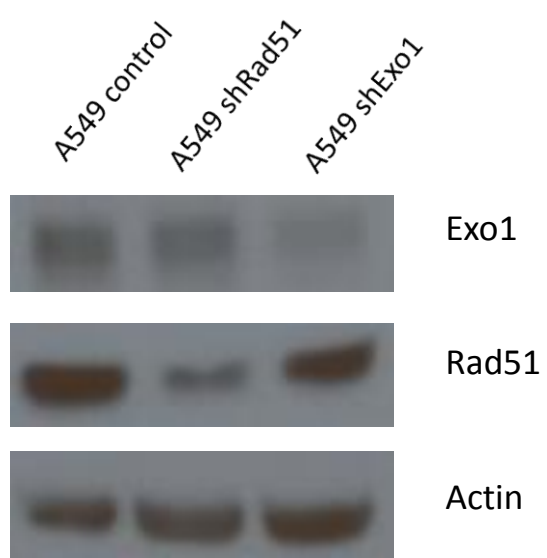

Supplement: NIHMS551273-supplement-01.pdf [file NIHMS551273-supplement-01.pdf]
